# Supplementary material for: Root Hair Single Cell Type Specific Profiles of Gene Expression and Alternative Polyadenylation Under Cadmium Stress
Source: PubMed Central journal article supplement (PMC6523994; doi:10.3389/fpls.2019.00589), 2019-05-10
Supplement: Data_Sheet_2.pdf [file Data_Sheet_2.pdf]

Cao et al. Supplemental materials

Table S1. Primers used in PAT-Seq library construction

| Primer name                       | Primer sequence                                                           |
|-----------------------------------|---------------------------------------------------------------------------|
| RT-PE series (bar-code is xxxxxx) | ACACTCTTTCCCTACACGACGCTCTTCCGATCTNN <u>XXXXXX</u> TTTTTTTTTTTTTTTTTTTTTVN |
| SMART 7.5                         | CGGTCTCGGCATTCTGCTGAACCGCTCTTCCGATCTGG+G                                  |
| PE-PCR 1                          | AATGATACGGCGACCACCGAGATCTACACTCTTTCCCTACACGACGCTCTTCCGATCT                |
| PE-PCR 2                          | CAAGCAGAAGACGGCATAACGAGATCGGTCTCGGCATTCTGCTGAACCGCTCTTCCGATC<br>T         |
| P5                                | AATGATACGGCGACCACCGA                                                      |
| P7                                | CAAGCAGAAGACGGCATAACGAGAT                                                 |

**Table S2. Alignment information of PAT-Seq libraries**

| Sample | Cell Type                | Cd stress | Reads      | PAT       | PAS    | PAC <sup>a</sup> |        |     |        |
|--------|--------------------------|-----------|------------|-----------|--------|------------------|--------|-----|--------|
|        |                          |           |            |           |        | 5' UTR           | Intron | CDS | 3' UTR |
| WRT    | Whole root tip           | 0 h       | 9,980,789  | 1,798,415 | 44,877 | 1%               | 5%     | 38% | 56%    |
|        |                          |           | 8,781,700  | 1,092,357 | 44,438 |                  |        |     |        |
|        |                          |           | 8,366,393  | 1,476,736 | 47,185 |                  |        |     |        |
| ADF    | root hair                | 0 h       | 10,287,027 | 1,516,278 | 35,404 | 1%               | 4%     | 29% | 66%    |
|        |                          |           | 9,135,112  | 1,722,100 | 40,082 |                  |        |     |        |
|        |                          |           | 10,055,330 | 1,851,594 | 39,503 |                  |        |     |        |
| GL2    | non-hair epidermal cells | 0 h       | 8,839,389  | 1,286,526 | 30,032 | 1%               | 5%     | 38% | 56%    |
|        |                          |           | 11,367,330 | 1,615,610 | 81,196 |                  |        |     |        |
|        |                          |           | 22,332,196 | 3,955,617 | 10,108 |                  |        |     |        |
| WRT    | Whole root tip           | 24 h      | 11,015,138 | 1,572,913 | 51,507 | 1%               | 5%     | 33% | 61%    |
|        |                          |           | 8,634,690  | 1,075,832 | 66,326 |                  |        |     |        |
|        |                          |           | 8,254,846  | 1,521,342 | 48,794 |                  |        |     |        |
| ADF    | root hair                | 24 h      | 7,245,465  | 1,126,295 | 38,990 | 2%               | 5%     | 32% | 61%    |
|        |                          |           | 9,864,419  | 1,365,878 | 38,108 |                  |        |     |        |

|     |                             |      |            |           |         |    |    |     |     |
|-----|-----------------------------|------|------------|-----------|---------|----|----|-----|-----|
|     |                             |      | 18,560,524 | 2,998,355 | 43,943  |    |    |     |     |
|     |                             |      | 6,289,179  | 1,028,827 | 65,305  |    |    |     |     |
| GL2 | non-hair<br>epidermal cells | 24 h | 13,428,730 | 1,559,194 | 49,636  | 1% | 5% | 33% | 61% |
|     |                             |      | 5,500,864  | 807,546   | 16,783  |    |    |     |     |
|     |                             |      | 12,879,422 | 1,350,261 | 36,913  |    |    |     |     |
| WRT | Whole root tip              | 48 h | 12,397,597 | 2,552,228 | 106,432 | 1% | 6% | 42% | 51% |
|     |                             |      | 17,761,010 | 2,347,663 | 37,385  |    |    |     |     |
|     |                             |      | 21,613,016 | 3,093,044 | 32,729  |    |    |     |     |
| ADF | root hair                   | 48 h | 7,653,705  | 1,177,809 | 40,895  | 2% | 5% | 36% | 57% |
|     |                             |      | 25,345,162 | 2,998,355 | 70,295  |    |    |     |     |
|     |                             |      | 6,404,123  | 716,351   | 55,585  |    |    |     |     |
| GL2 | non-hair<br>epidermal cells | 48 h | 34,817,491 | 5,290,245 | 143,569 | 1% | 5% | 35% | 59% |
|     |                             |      | 10,911,672 | 1,663,680 | 68,652  |    |    |     |     |
|     |                             |      | 10,637,701 | 1,239,683 | 28,662  |    |    |     |     |
| WRT | Whole root tip              | 72 h | 10,385,496 | 1,491,611 | 80,303  | 1% | 5% | 35% | 59% |
|     |                             |      | 9,389,175  | 1,597,390 | 25,506  |    |    |     |     |
|     |                             |      | 10,067,129 | 1,531,129 | 16,914  |    |    |     |     |
| ADF | root hair                   | 72 h | 7,719,622  | 1,126,544 | 30,700  | 1% | 4% | 31% | 64% |

|     |                 |      |           |           |         |    |    |     |     |
|-----|-----------------|------|-----------|-----------|---------|----|----|-----|-----|
|     |                 |      | 7,857,221 | 1,249,991 | 45,894  |    |    |     |     |
|     |                 |      | 8,644,954 | 1,301,264 | 66,900  |    |    |     |     |
| GL2 | non-hair        | 72 h | 7,035,624 | 917,724   | 64,423  | 1% | 5% | 35% | 59% |
|     | epidermal cells |      | 9,546,141 | 1,647,269 | 121,262 |    |    |     |     |

<sup>a</sup>PAC supported by less than 10 PATs or more than 1000 PATs were discarded to prevent from amplification artifacts. Percentage of identified PACs from specific genomic regions was listed.

**Table S3. Functions of poly(A) site switching genes detected from sample-to-sample comparison**

| Gene ID   | Name   | Description                                                                                                  | ADF vs GL2 <sup>a</sup> |        |        | ADF vs WRT <sup>b</sup> |     |        |        |        |
|-----------|--------|--------------------------------------------------------------------------------------------------------------|-------------------------|--------|--------|-------------------------|-----|--------|--------|--------|
|           |        |                                                                                                              | (h)                     | (h)    | (h)    | (h)                     | (h) | (h)    |        |        |
|           |        |                                                                                                              | 0                       | 2<br>4 | 4<br>8 | 7<br>2                  | 0   | 2<br>4 | 4<br>8 | 7<br>2 |
| AT5G22410 | RH18   | Root hair specific 18                                                                                        | L                       |        |        |                         |     |        |        |        |
| AT1G34510 |        | Peroxidase superfamily protein                                                                               | L                       |        | L      |                         |     |        |        |        |
| AT3G07490 | AGD11  | A member of ARF GAP domain.                                                                                  | L                       |        |        |                         |     |        |        |        |
| AT2G32240 |        | early endosome antigen                                                                                       | S                       |        |        |                         |     |        |        |        |
| AT1G08340 |        | Rho GTPase activating protein with PAK-box/P21-Rho-binding domain-containing protein                         | L                       |        |        |                         |     |        |        |        |
| AT1G43160 | RAP2.6 | Encodes a member of the ERF (ethylene response factor) subfamily B-4 of ERF/AP2 transcription factor family. | L                       |        |        |                         |     |        |        |        |
| AT5G52510 | SCL8   | SCARECROW-like 8                                                                                             | S                       |        |        |                         |     |        |        |        |
| AT3G58750 | CSY2   | Encodes a peroxisomal citrate synthase that is expressed throughout seedling and shoot development.          | L                       |        |        |                         |     |        |        |        |
| AT1G77180 | SKIP   | Encodes a putative transcriptional factor.                                                                   | L                       |        |        |                         |     |        |        |        |
| AT5G17910 |        | Cardiomyopathy-associated protein                                                                            | L                       |        |        |                         |     |        |        |        |

|           |               |                                                                                         |   |   |  |  |  |  |  |  |  |  |  |
|-----------|---------------|-----------------------------------------------------------------------------------------|---|---|--|--|--|--|--|--|--|--|--|
| AT5G27850 | RPL18C        | Ribosomal protein L18e/L15 superfamily protein                                          | S |   |  |  |  |  |  |  |  |  |  |
| AT1G20440 | ATCOR<br>47   | Belongs to the dehydrin protein family.                                                 | L |   |  |  |  |  |  |  |  |  |  |
| AT5G49760 |               | Leucine-rich repeat protein kinase family protein                                       | L |   |  |  |  |  |  |  |  |  |  |
| AT5G07080 |               | HXXXD-type acyl-transferase family protein                                              | L |   |  |  |  |  |  |  |  |  |  |
| AT2G40950 | ATBZIP<br>17  | bZIP17 appears to regulate transcription as part of a salt and osmotic stress response. | S |   |  |  |  |  |  |  |  |  |  |
| AT5G67480 | ATBT4         | BTB and TAZ domain protein                                                              | L | L |  |  |  |  |  |  |  |  |  |
| AT5G19560 | GEF10         | Encodes a member of KPP-like gene family.                                               | L |   |  |  |  |  |  |  |  |  |  |
| AT1G20970 |               | Calponin-like domain protein                                                            | S |   |  |  |  |  |  |  |  |  |  |
| AT4G09000 | GRF1          | Encodes a 14-3-3 gene, designated GRF1 chi.                                             | L |   |  |  |  |  |  |  |  |  |  |
| AT4G20260 | ATPCA<br>P1   | Encodes a Ca <sup>2+</sup> and Cu <sup>2+</sup> binding protein.                        | S |   |  |  |  |  |  |  |  |  |  |
| AT1G22360 | ATUGT<br>85A2 | UDP-glucosyl transferase 85A2                                                           | L |   |  |  |  |  |  |  |  |  |  |
| AT4G14320 | API2          | Zinc-binding ribosomal protein family protein                                           |   | L |  |  |  |  |  |  |  |  |  |
| AT3G23990 | HP60          | Mitochondrial chaperonin HP.                                                            |   | L |  |  |  |  |  |  |  |  |  |
| AT3G09260 | BGLU2<br>3    | Encodes beta-glucosidase.                                                               |   | S |  |  |  |  |  |  |  |  |  |

|           |             |                                                             |  |   |   |   |  |   |  |  |
|-----------|-------------|-------------------------------------------------------------|--|---|---|---|--|---|--|--|
| AT4G37410 | CYP81F<br>4 | A member of CYP81F                                          |  | L |   |   |  | S |  |  |
| AT1G43170 | ARP1        | Encodes a cytoplasmic ribosomal protein.                    |  | L |   |   |  |   |  |  |
| AT5G54370 |             | Late embryogenesis abundant protein-like protein            |  | L | S |   |  |   |  |  |
| AT1G56070 | LOS1        | Encodes a translation elongation factor 2-like protein.     |  | L |   |   |  |   |  |  |
| AT5G62690 | TUB2        | Encodes tubulin beta-2/beta-3 chain.                        |  | S |   |   |  | S |  |  |
| AT5G61350 | CAP1        | Encodes a tonoplast-localized receptor-like kinase.         |  | S |   |   |  |   |  |  |
| AT1G26270 |             | Phosphatidylinositol 3- and 4-kinase family protein         |  | S |   |   |  |   |  |  |
| AT3G21810 |             | Zinc finger C-x8-C-x5-C-x3-H type family protein            |  | S |   |   |  |   |  |  |
| AT5G04970 |             | Plant invertase/pectin methylesterase inhibitor superfamily |  | S |   |   |  | L |  |  |
| AT3G46040 | RPS15<br>AD | Regulated by TCP20.                                         |  |   | S |   |  |   |  |  |
| AT4G27090 |             | Ribosomal protein L14                                       |  |   | S |   |  |   |  |  |
| AT2G27530 | PGY1        | Encodes ribosomal protein L10Ap.                            |  |   | S |   |  |   |  |  |
| AT1G55850 | ATCSLE<br>1 | encodes a protein similar to cellulose synthase             |  |   | S |   |  |   |  |  |
| AT5G67400 | RH19        | root hair specific 19                                       |  |   |   | S |  |   |  |  |

|           |         |                                                                                                                                                                                             |  |  |  |   |   |  |  |
|-----------|---------|---------------------------------------------------------------------------------------------------------------------------------------------------------------------------------------------|--|--|--|---|---|--|--|
| AT3G11120 |         | Ribosomal protein L41 family                                                                                                                                                                |  |  |  | S |   |  |  |
| AT1G50920 | NOG1-1  | Putative GTPase involved in HA - and ABA-mediated signaling pathways                                                                                                                        |  |  |  | L |   |  |  |
| AT3G01790 |         | Ribosomal protein L13 family protein                                                                                                                                                        |  |  |  | S |   |  |  |
| AT5G08590 | ASK2    | Encodes a member of SNF1-related protein kinases.                                                                                                                                           |  |  |  | L |   |  |  |
| AT4G08400 |         | Proline-rich extensin-like family protein                                                                                                                                                   |  |  |  | L |   |  |  |
| AT3G60330 | AHA7    | H <sup>+</sup> -ATPase 7                                                                                                                                                                    |  |  |  | L |   |  |  |
| AT5G42020 | BIP     | Luminal binding protein involved in polar nuclei fusion during proliferation of endosperm nuclei.                                                                                           |  |  |  | L |   |  |  |
| AT5G06640 | EXT10   | Proline-rich extensin-like family protein                                                                                                                                                   |  |  |  | L |   |  |  |
| AT2G25670 |         | hypothetical protein                                                                                                                                                                        |  |  |  | L |   |  |  |
| AT3G16420 | JAL30   | The PBP1(PYK10-binding protein 1) assists the PYK10 (beta-glucosidase complex) in its activity and may act like a molecular chaperone that facilitates the correct polymerization of PYK10. |  |  |  | S |   |  |  |
| AT4G08350 | GTA02   | Global transcription factor group A2                                                                                                                                                        |  |  |  |   | L |  |  |
| AT1G67230 | ATLINC1 | Encodes a nuclear coiled-coil protein.                                                                                                                                                      |  |  |  |   | S |  |  |
| AT3G53020 | RPL24   | Encodes ribosomal protein L24.                                                                                                                                                              |  |  |  |   | L |  |  |



|           |             |                                                                                                                                                                  |  |  |  |  |  |  |  |   |  |  |
|-----------|-------------|------------------------------------------------------------------------------------------------------------------------------------------------------------------|--|--|--|--|--|--|--|---|--|--|
| AT4G25820 | ATXTH<br>14 | Encodes a xyloglucan endotransglycosylase.                                                                                                                       |  |  |  |  |  |  |  | L |  |  |
| AT4G13390 | EXT12       | Proline-rich extensin-like family protein                                                                                                                        |  |  |  |  |  |  |  | L |  |  |
| AT3G58840 | PMD1        | Encodes peroximal and mitochondrial division factor 1.                                                                                                           |  |  |  |  |  |  |  | L |  |  |
| AT2G47110 | UBI6        | Polyubiquitin gene                                                                                                                                               |  |  |  |  |  |  |  | L |  |  |
| AT5G54670 | ATK3        | Encodes a truncated KatC polypeptide.                                                                                                                            |  |  |  |  |  |  |  | S |  |  |
| AT5G43580 | UPI         | Predicted to encode a PR (pathogenesis-related) peptide that belongs to the PR-6 proteinase inhibitor family.                                                    |  |  |  |  |  |  |  | S |  |  |
| AT1G23750 |             | Nucleic acid-binding, OB-fold-like protein                                                                                                                       |  |  |  |  |  |  |  | L |  |  |
| AT5G27120 |             | SAR DNA-binding protein                                                                                                                                          |  |  |  |  |  |  |  | S |  |  |
| AT1G65440 | GTB1        | Related to yeast Spt6 protein, which functions as part of a protein complex in transcription initiation and also plays a role in chromatin structure / assembly. |  |  |  |  |  |  |  | L |  |  |
| AT1G75750 | GASA1       | GA-responsive GAST1 protein homolog regulated by BR and GA antagonistically                                                                                      |  |  |  |  |  |  |  | L |  |  |
| AT5G64100 |             | Peroxidase superfamily protein                                                                                                                                   |  |  |  |  |  |  |  | L |  |  |
| AT2G43090 | IPMI        | One of these genes encoding the small subunit of isopropylmalate isomerase.                                                                                      |  |  |  |  |  |  |  | L |  |  |
| AT2G17350 |             | beta-mannosyltransferase-like protein                                                                                                                            |  |  |  |  |  |  |  | S |  |  |
| AT1G48300 | DGAT3       | Diacylglycerol acyltransferase                                                                                                                                   |  |  |  |  |  |  |  | S |  |  |

|           |              |                                                       |  |  |  |  |  |  |  |  |  |   |
|-----------|--------------|-------------------------------------------------------|--|--|--|--|--|--|--|--|--|---|
| AT1G62480 |              | Vacuolar calcium-binding protein-like protein         |  |  |  |  |  |  |  |  |  | L |
| AT2G01060 |              | myb-like HTH transcriptional regulator family protein |  |  |  |  |  |  |  |  |  | L |
| AT5G02500 | ATHP7<br>0-1 | Encodes a member of heat shock protein 70 family.     |  |  |  |  |  |  |  |  |  | S |

<sup>a</sup> In comparison between GL2 and ADF, ADF used the longer or shorter isoform due to the poly(A) site switching.

<sup>b</sup> In

comparison between WRT and ADF, ADF used the longer or shorter isoform due to the poly(A) site switching.
